# Supplementary material for: Reliability assessment of a peer evaluation instrument in a team-based learning course
Source: PubMed Central journal article supplement — Pharm Pract (Granada). 2016 Mar 15;14(1):676. doi: 10.18549/PharmPract.2016.01.676 (PMC4800015; doi:10.18549/pharmpract.2016.01.676), 2016-03-15
Supplement: pharmpract-14-676-suppl.pdf [file pharmpract-14-676-suppl.pdf]

## Appendix: Peer Evaluation Survey

**Instructions:** Please rate the contributions of each member of your team throughout this semester thus far. Briefly provide the reasons for your ratings. Comments and constructive criticism from the evaluation will be compiled as well as an average of the scores and given back to each group member in a timely manner. The persons providing feedback will remain anonymous and any destructive or identifiable comments will be removed.

Please reflect on the following aspects:

- **Quality of Work** (How prepared were they when they came to class? How valuable or relevant was their contribution to the group?)
- **Quantity of Work** (*How much did they participate? What was their involvement?*)
- **Clinical communication skills** (*Were they willing to voice differences of opinion? Were they flexible when disagreements occurred?*)
- **Timeliness and responsibility** (*How reliable is your team member?*)

Individual scores will be the average of the points that they receive from members of their team. Raters must differentiate some in their ratings – you must give at least one score of 9 or lower, and one score of 11 or higher. You will assign an average score of 10 points to the other members of your team. (For example, you should assign a total of 50 points in a six-member team. You do not rate yourself.)

Briefly provide the reasons for your ratings. Positive comments and constructive criticism will be compiled and given back to each member through Blackboard in a timely manner. The persons providing feedback will remain anonymous and any destructive or identifiable comments will be removed.

*Example:*

| Name      | Points Assigned | Feedback                                                                                                                                                                                                                                     |
|-----------|-----------------|----------------------------------------------------------------------------------------------------------------------------------------------------------------------------------------------------------------------------------------------|
| Student A | 5               | Does a good job of wanting to participate, needs improvement in quality of work and initiative. Needs to take ownership of tasks and be more interactive with the group.                                                                     |
| Student B | 9               | Comes to class ready to work. Has definitely stepped up in terms of speaking with the group. Keep up the good work.                                                                                                                          |
| Student C | 8               | Came to class prepared. Contributed to group work. Willing to voice difference of opinion; however, it can come across argumentative sometimes. Prepared Google docs for group work.                                                         |
| Student D | 12              | Great verbal communication. Great job on the SOAP note presentation. Pleasant to work with. On time and seems prepared. Reliably completes assignments on time.                                                                              |
| Student E | 16              | Always prepared for class. Regarding projects or assignments he goes above and beyond to verify information and make sure the assignments are completed properly and timely. He listens to concerns and voices his own. He is very reliable. |
